# Supplementary material for: Optimizing use of U.S. Ex-PVP inbred lines for enhancing agronomic performance of tropical Striga resistant maize inbred lines
Source: PubMed Central journal article supplement (PMC9185936; doi:10.1186/s12870-022-03662-1), 2022-06-10
Supplement: 12870_2022_3662_MOESM6_ESM.pdf [file 12870_2022_3662_MOESM6_ESM.pdf]

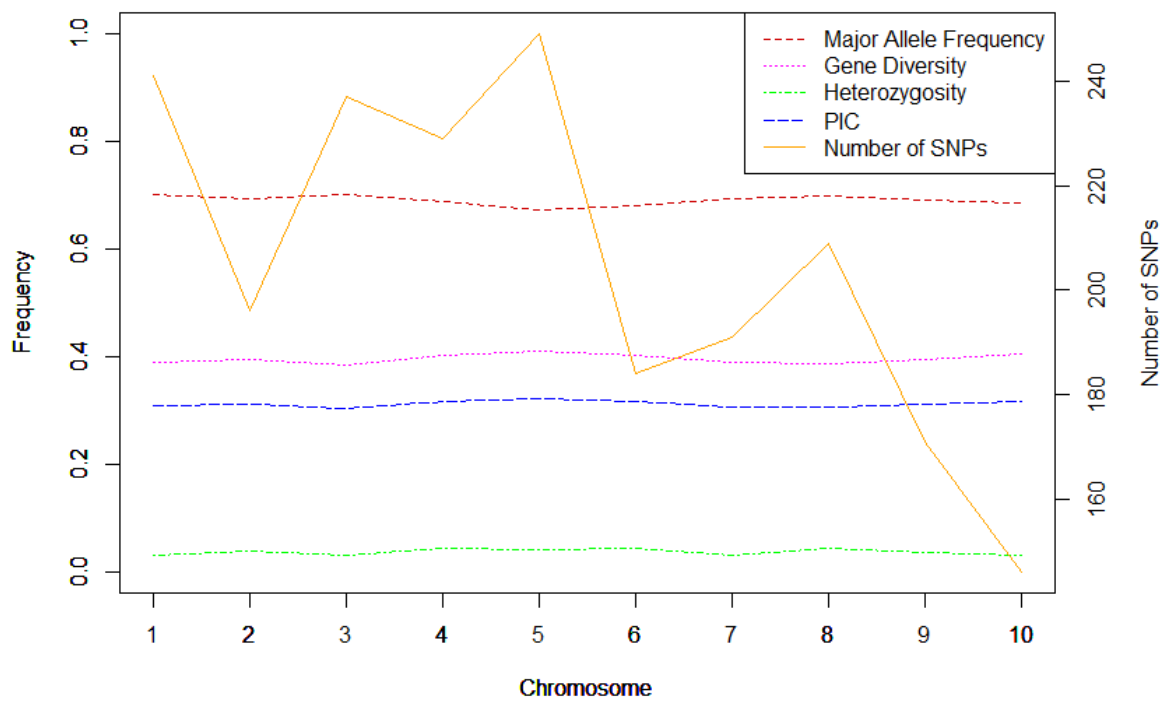

**Fig. S1.** Summary statistics of 2053 DArTag SNP markers used to assess the genetic diversity among the Ex-PVP inbred lines

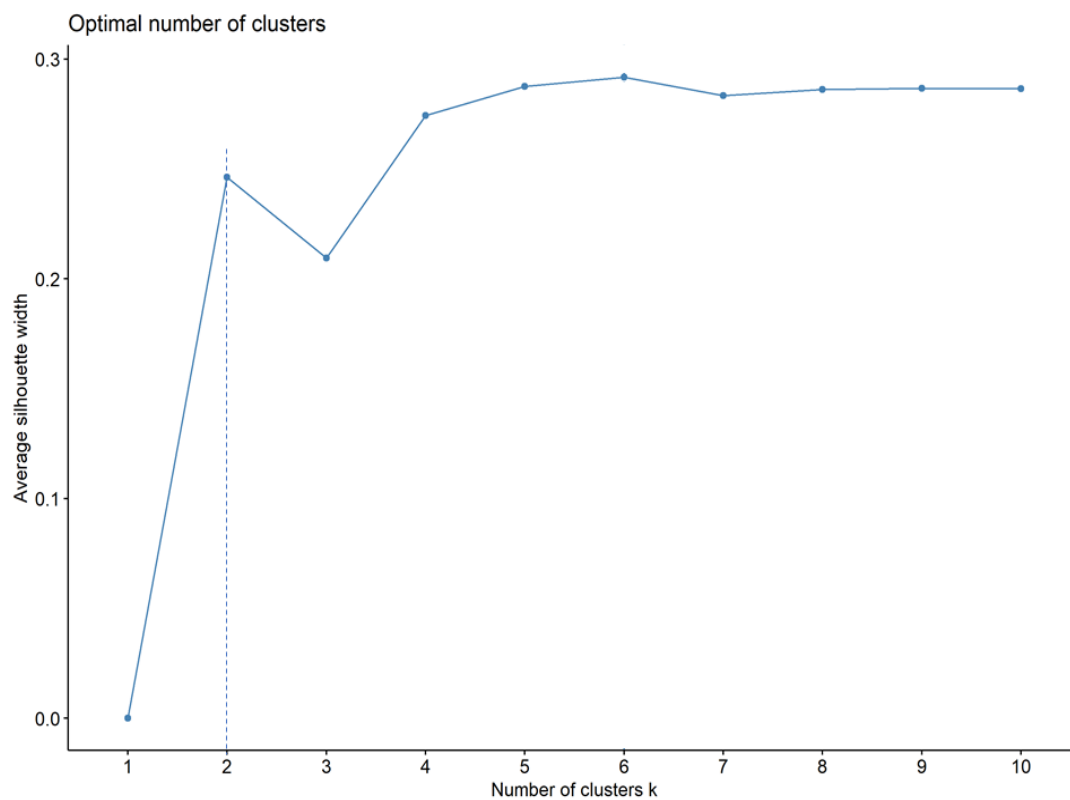

**Fig. S2.** Determination of the most appropriate number of clusters in structure analysis using cross-validation error ( $k$ ) means
